# Supplementary material for: Potential Role of Macrophage Polarization in the Progression of Hunner-Type Interstitial Cystitis
Source: MDPI journal article supplement (doi:10.3390/ijms25020778), 2024-01-08
Supplement: s1 [file s1]

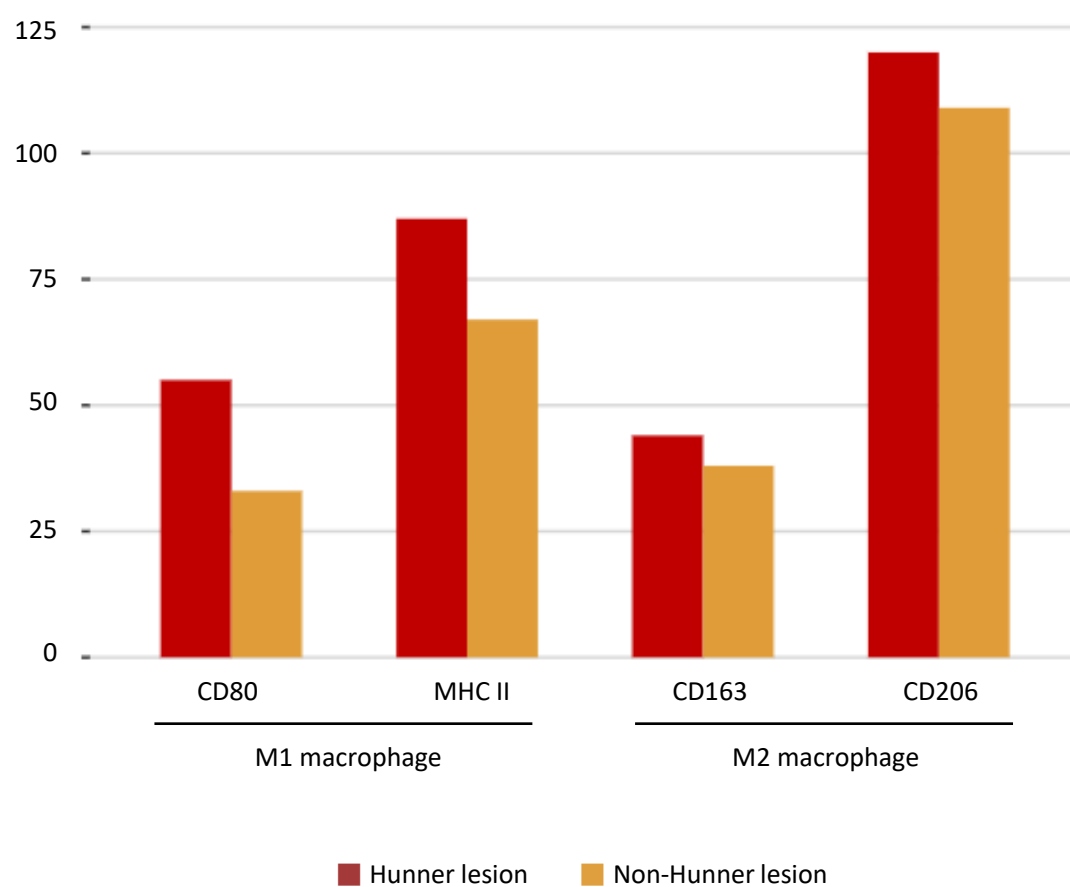

**Supplementary Figure S1.** Cell count (Numbers per high-power field) of M1 macrophages (CD80 and MHC II) and M2 macrophages (CD163 and CD206) in Hunner and non-hunner lesions.

**A** Mucosal layer

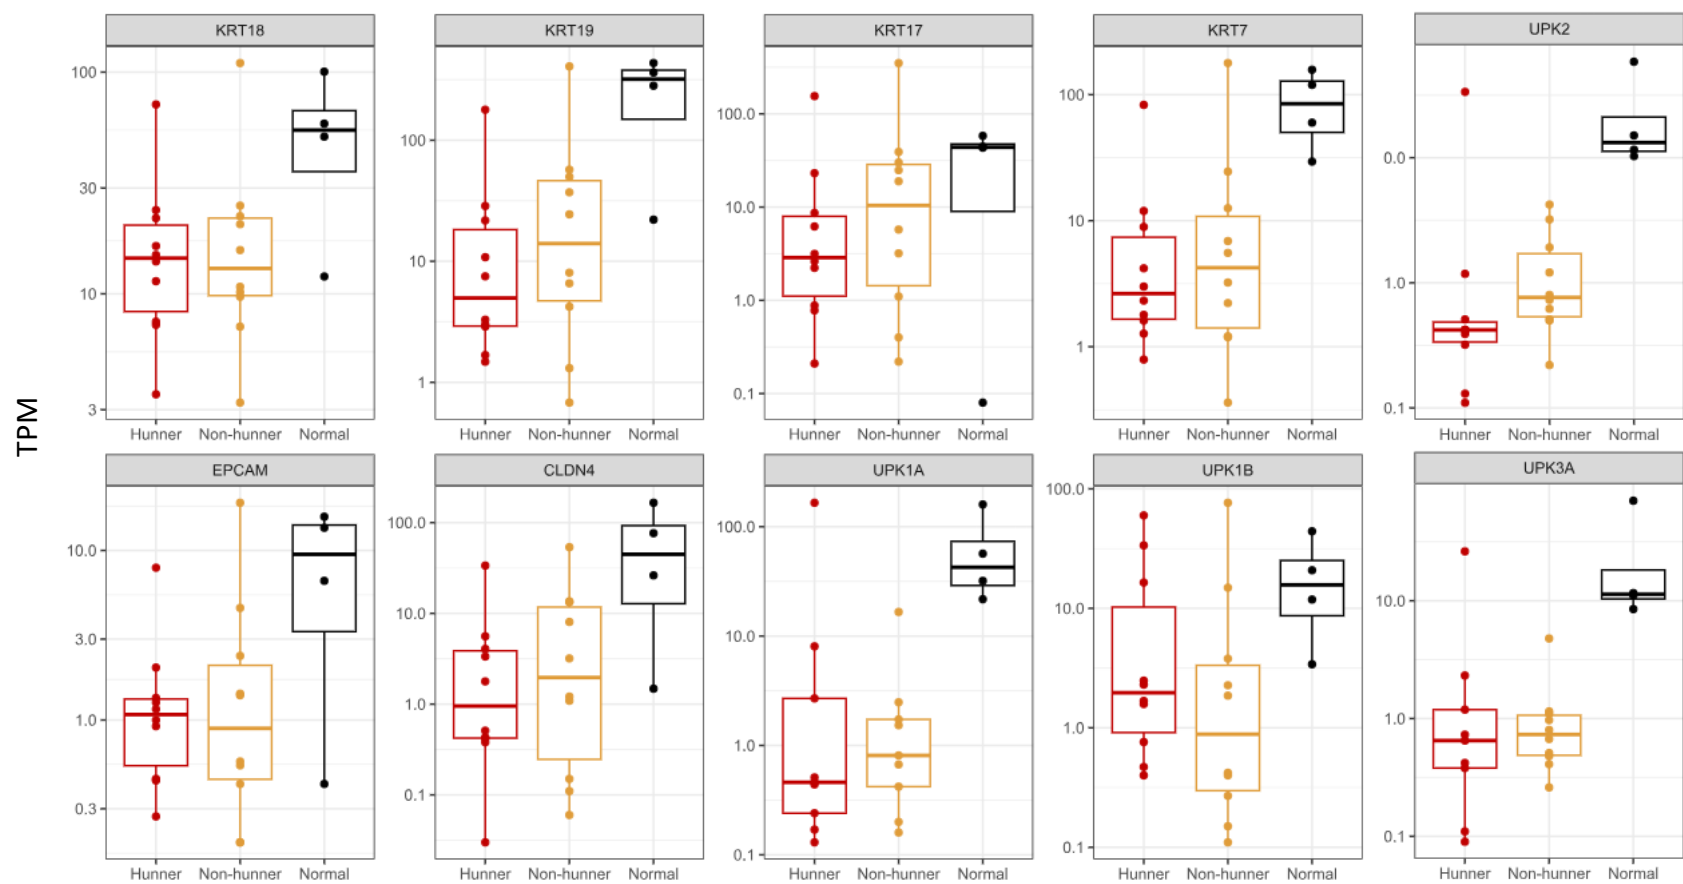

**B** Serosal/Muscular layer

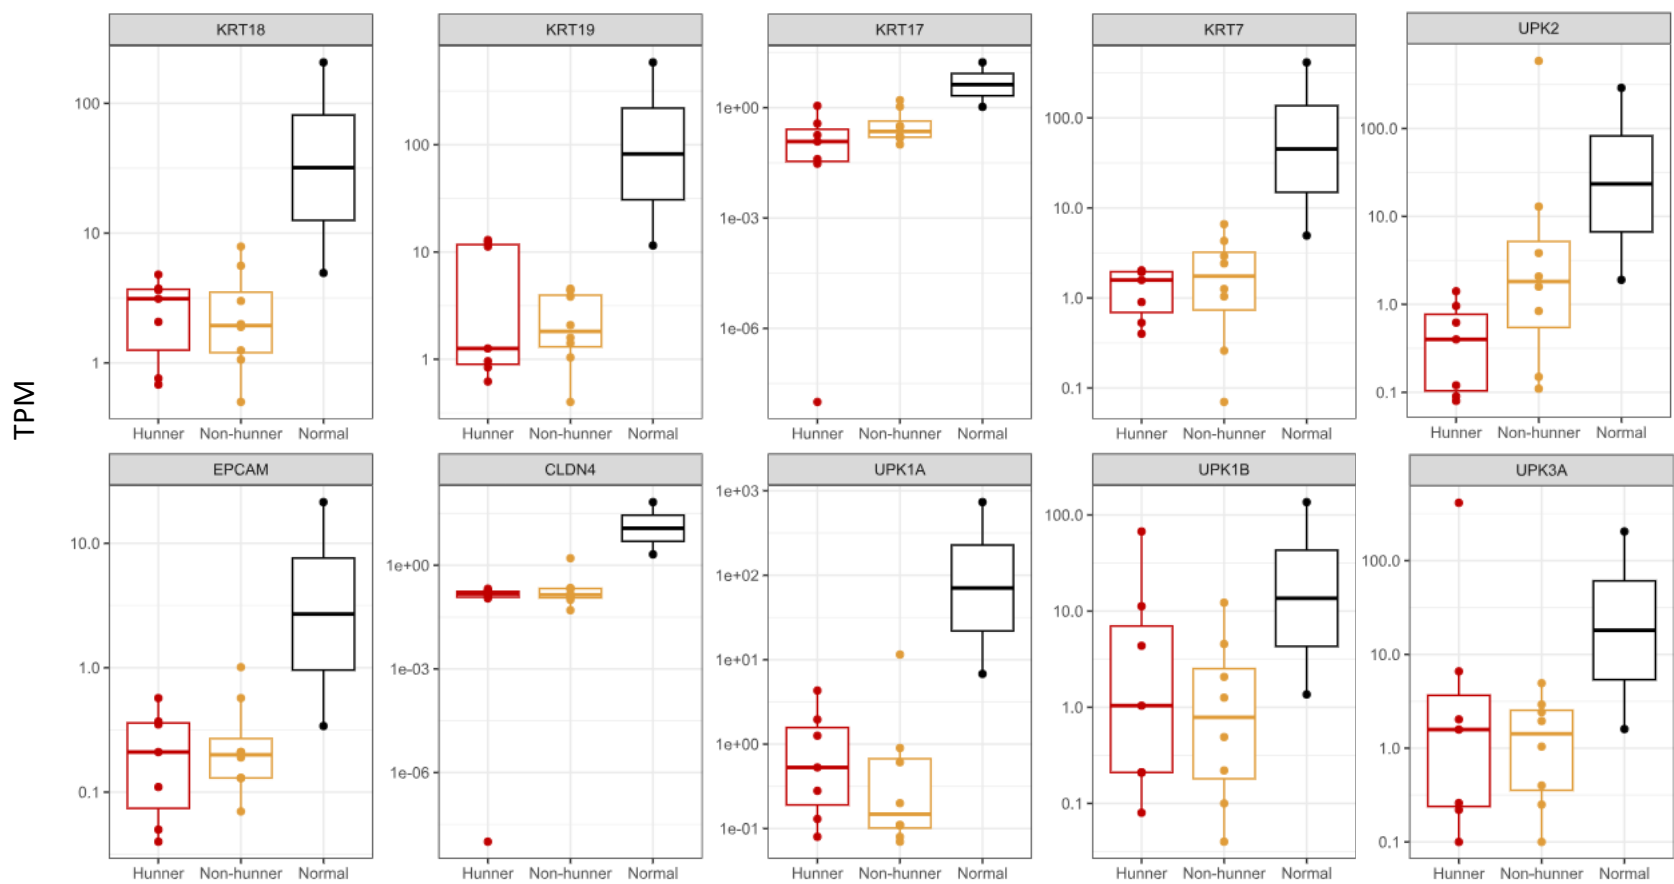

**Supplementary Figure S2.** Expression of epithelial marker genes in mucosal layer (A) and serosal/muscular layer (B).
